# Supplementary material for: Supramolecular self-assembly and photovoltaic property of soluble fluorogallium phthalocyanine
Source: Royal Society of Chemistry journal article supplement (doi:10.1039/c4ra03941f), 2014-01-01
Supplement: c4ra03941f1.pdf [file c4ra03941f1.pdf]

*Electronic Supporting Information*

**Supramolecular Self-assembly and Photovoltaic Property of Soluble  
Fluorogallium Phthalocyanine**

Jian Zhang,<sup>a</sup> Yaowen Li,<sup>a</sup> Laibing Wang,<sup>a</sup> Michiya Fujiki,<sup>b</sup> Xiaopeng Li,<sup>c</sup> Zhengbiao Zhang,<sup>a</sup> Wei Zhang,<sup>\*,a</sup> Nianchen Zhou<sup>a</sup> and Xiulin Zhu<sup>\*,a</sup>

<sup>a</sup> Jiangsu Key Laboratory of Advanced Functional Polymer Design and Application, Department of Polymer Science and Engineering, College of Chemistry, Chemical Engineering and Materials Science, Soochow University, Suzhou, 215123, P. R. China

<sup>b</sup> Graduate School of Materials Science, Nara Institute of Science and Technology, 8916-5 Takayama, Ikoma, Nara 630-0036, Japan

<sup>c</sup> Department of Chemistry and Biochemistry, Texas State University, San Marcos, Texas 78666, United States

Corresponding Author: Wei Zhang, E-mail: weizhang@suda.edu.cn or Xiulin Zhu, E-mail: xlzhu@suda.edu.cn, Fax/Tel: 0086-512-65882787

## 1. ESI-MS and ESI-TWIM MS experiments of ttbPcGaOH

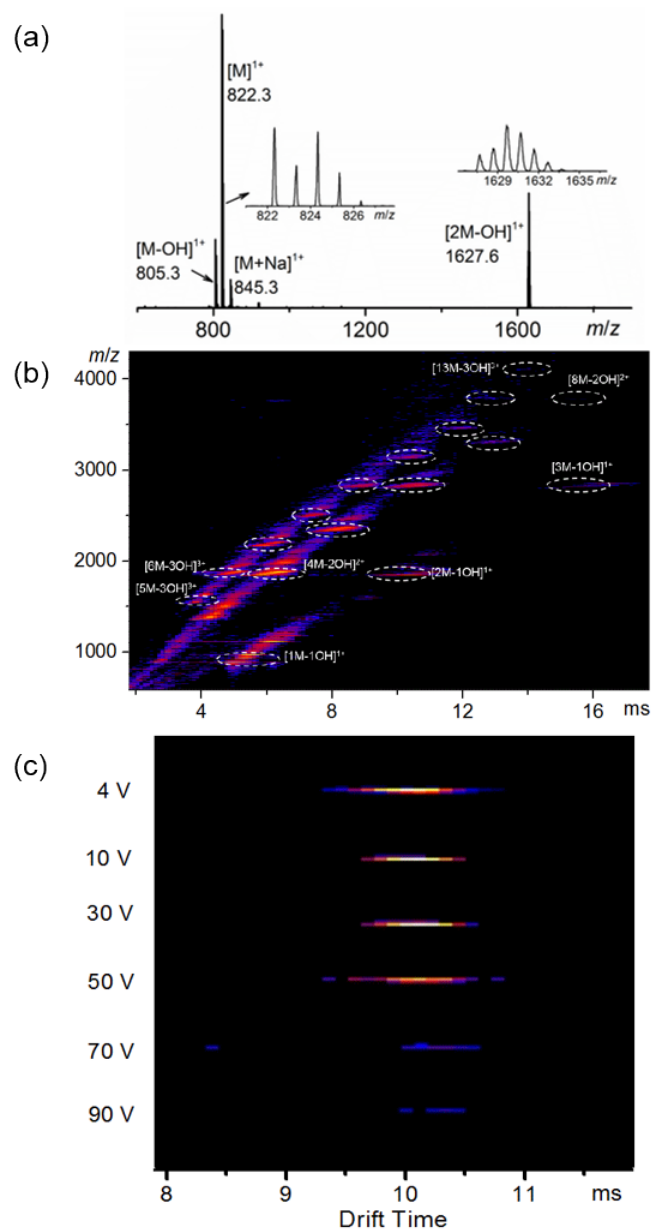

**Fig. S1** (a) Conventional ESI and (b) two-dimensional ESI-TWIM mass spectra of ttbPcGaOH. (c) Two-dimensional  $gMS^2$  TWIM plot of  $[2M-OH]^+$  at  $m/z = 1627.6$ . Collisionally activated dissociation took place in the trap cell (before ion mobility separation) at different energies, which was varied by raising the potential applied to the trap from 4 to 100 V. The ions exiting the trap were subsequently separated in the ion mobility region.

## 2. UV-vis measurement of ttbPcGaOH in solution and thin film

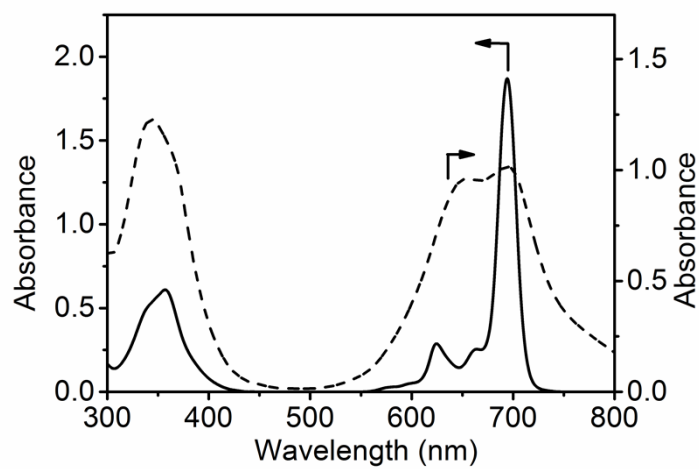

**Fig. S2** UV-vis spectra of ttbPcGaOH in 1, 2-dichloroethane (solid line) ( $10^{-5}$  mol L $^{-1}$ ) and the corresponding cast film on a quartz plate (dashed line).

### 3. TEM measurement of ttbPcGaOH

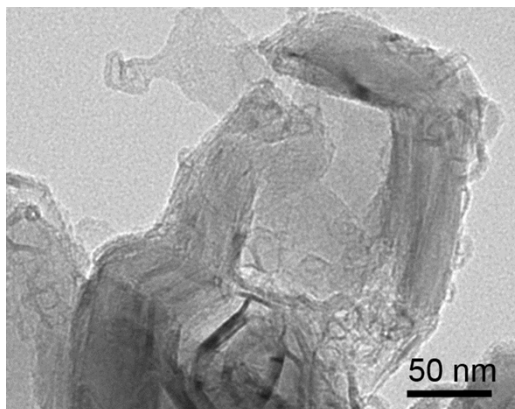

**Fig. S3** TEM image of ttbPcGaOH casting from a 1, 2-dichloroethane solution ( $10^{-5}$  mol L<sup>-1</sup>).

#### 4. WAXS measurement of ttbPcGaOH

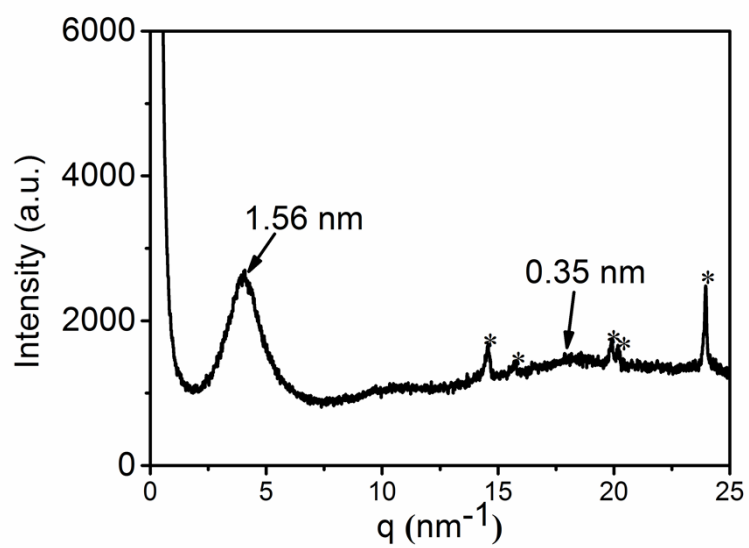

**Fig. S4** WAXS profile of ttbPcGaOH powder. Asterisk (\*) indicates the background peaks of aluminized paper.

**5. The photovoltaic property of BHJ OSC prepared from ttbPcGaF:PC<sub>61</sub>BM**

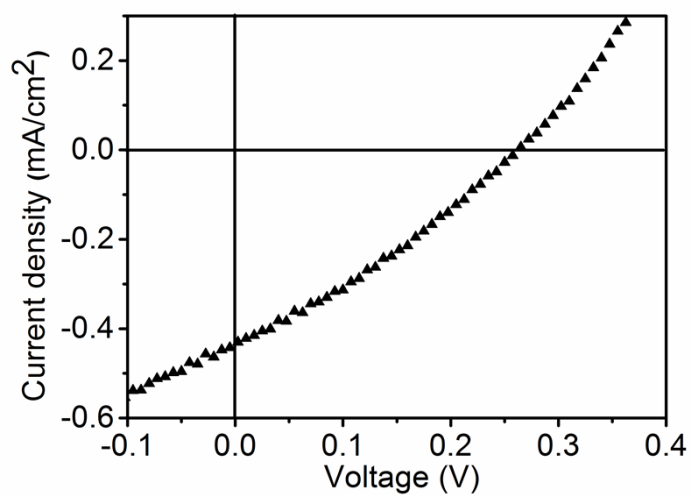

**Fig. S5** Current-voltage characteristic of photovoltaic cell prepared from ttbPcGaF:PC<sub>61</sub>BM under illumination of AM 1.5, 100 mW cm<sup>-2</sup> white light.

## 6. TEM and AFM measurements of $\text{ttbPcGaOH:PC}_{61}\text{BM}$ blend film

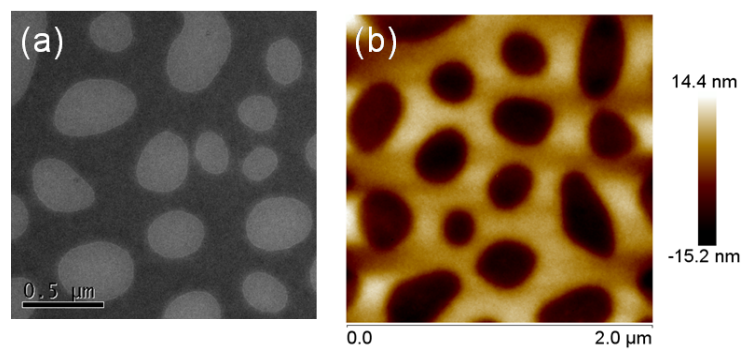

**Fig. S6** (a) TEM image and (b) AFM image of  $\text{ttbPcGaOH:PC}_{61}\text{BM}$  blend film, RMS (root mean square) = 5.94 nm.

## 7. GISAXS measurement of ttbPcGaOH:PC<sub>61</sub>BM blend film

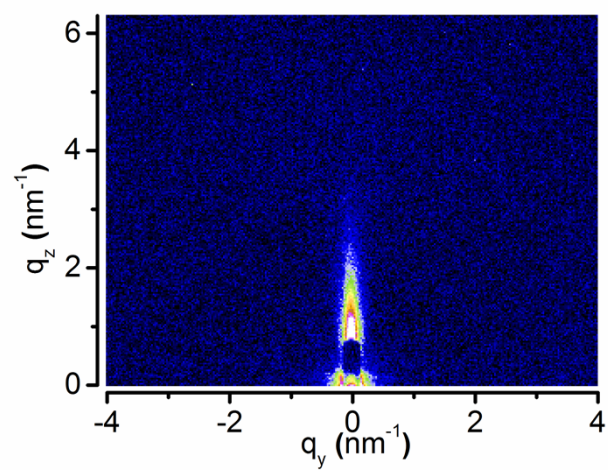

**Fig. S7** 2D-GISAXS image of ttbPcGaOH:PC<sub>61</sub>BM blend film.
